# Supplementary material for: Applying critical systems thinking to social prescribing: a relational model of stakeholder “buy-in”
Source: BMC Health Serv Res. 2020 Jun 24;20:580. doi: 10.1186/s12913-020-05443-8 (PMC7312116; doi:10.1186/s12913-020-05443-8)
Supplement: Supplementary file 3 — Additional file 3. Word frequency cloud core stakeholder interviews: created through NVivo software, this diagram illustrates the frequency with which participants who were core team members used a word or phrase during the semi-structured interview. The word at the “heart” of the cloud is “people,” pointing to the importance placed on the relational element of social prescribing. [file 12913_2020_5443_MOESM3_ESM.pdf]

think people well prescribing  
yeah got bit actually  
social know want point services  
seenow find care look one thing  
may sort time evaluation  
just really come  
get take health many  
need community help  
quite make obviously saying  
good great orking  
whole eady trying things  
might feel whether  
done part involved patients  
data much something getting support  
yesgoing different  
practices definitely probably  
example
